# Supplementary material
Source: PubMed Central journal article supplement (PMC2962463)
Supplement: supp_M110.152090_supplementary_table.pdf [file supp_M110.152090_supplementary_table.pdf]

### **Primers used to clone human genes and 3'UTRs**

locations are given in relation to the GRCh37/hg19 assembly

```
CROT      >chr7:87028008-87028383
sense     ATACA GAATTC AGTGCTGGGAGTGAGTTGG
reverse   TTATA TCTAGATTCATACCCTTTGGCAGCTA

HADHB     >chr2:26512785-26513112
sense     ATACA GAATTC GGGCCATGCTATGATAGTGG
reverse   TTATA TCTAGA CCAACTGCAAACCCTCATTT

NPC1      >chr18:21111587-21112007
sense     ATACA GAATTC CACAGTTGACTTGGGAAGCA
reverse   TTATA TCTAGA AAGGGGAACACTGTGAAGAACA

CPT1A     >chr11:68522476-68523895
sense     ATACA TCTAGA cccagcctgtccttcagata
reverse   TTATTG GAATTC ccatggctgcgttaagacaat

ATP8B1    >chr18:55313651-55313881
sense     ATACA GAATT CTGTTAGTTTCAGATTTCTC TCCT
reverse   TTATTG TCTAG AAGCCAATTTA AATACTTTAGAAG

ABCA1     >chr9:107546304-107546653
sense     ATACA GAATTC CGTTGCAGTTCTCACATCTTTT
reverse   TTATA ACTAGT CCCATATGTCCATTGGGTT

miRNA33 a >chr22:42296734+42297276
sense     ATACA GTCGAC CAGAGTCCCAGGTCCTGCT
reverse   TTCAT AGATCT GCCTAGCCAGCTAAGACCAA

SLC25A25
sense     ATACA GAATTC AGGTGCCTCTCACTGTGAA
reverse   TTATA TCTAGA AAGGCTGCTTTAAATGACA
```

### **Primers used to clone Drosophila 3'UTR**

Location is given according to the BDGP R5/dm3 alignment

```
Drosophila >chr2R:6357009-6357266
sense     CCCGTTTAGTCCATGTAGTCG
reverse   AAGGTTACGCGATTTCTTCG
```
