# Supplementary material
Source: PubMed Central journal article supplement (PMC2962463)
Supplement: supp_M110.152090_supplfigs.pdf [file supp_M110.152090_supplfigs.pdf]

## Supplementary figure legends

SUPPLEMENTARY FIGURE S1. **Lentiviral construct.** Schematic representation of the PCR fragment encompassing the genomic locus of miR-33a that was introduced in the lentiviral construct.

SUPPLEMENTARY FIGURE S2. **Reporter gene constructs.** Schematic representation of the PCR product inserted in the reporter constructs for *A.* human ABCA1, *B.* human CROT, *C.* human HADHB, *D.* human CPT1A, *E.* *Drosophila melanogaster* CPT1, *F.* human ATP8B1, *G.* NPC1 and *H.* SLC25A25. Numbers denote the nucleotide position in GRCh37/hg19 human and BDGP R5/dm3 *drosophila* genome assembly. Feathered lines denote introns, and black boxes the PCR product, the miR-33 binding site or the open reading frame (ORF) as indicated.

SUPPLEMENTARY FIGURE S3. **miR-33b is localized in the SREBP1 gene.** Schematic representation of the human SREBP1 locus with embedded miR-33b sequence including evolutionary conservation of the latter.

SUPPLEMENTARY FIGURE S4. **The binding site for miR-33 in ABCA1 is highly conserved and consists of tandem repetitions of seed-binding sites.** *A.* Evolutionary conservation of the predicted miR-33 binding site in the 3'UTR of ABCA1. Light grey indicates possibility of classical Watson-Crick pairing with miR-33 and dark grey indicates GU pairs. *B.* The predicted miR-33 binding site in the 3'UTR of ABCA1 contains three tandem repeats of a sequence perfectly complementary to miR-33 (circled). The most favorable annealing is depicted. Since mutagenesis of one, two or three of these repeats might lead to alternative site usage in a potentially suboptimal annealing, which does not allow any conclusions about normal seed binding, we decided to mutagenize all three seed sequences in parallel.

SUPPLEMENTARY FIGURE S5. **miR-33 targets ABCA1 and HADHB in mouse adrenocortical cancer cell line Y1.** Western Blot analysis of Y1 mouse adrenocortical cancer cell lines engineered to overexpress miR-33a. Note that the HADHB antibody crossreacts with a band around 45kDa in mouse samples. The band that corresponds to the size of human HADHB is marked with an arrow.

SUPPLEMENTARY FIGURE S6. **Conservation of miR-33 binding site in HADHB 3'UTR.** Evolutionary conservation of the predicted miR-33 binding site in the 3'UTR of HADHB. Light grey shading indicates a residue that can undergo a classical Watson-Crick pair with miR-33 while dark grey shading indicates GU pairs.

SUPPLEMENTARY FIGURE S7. **Conservation of miR-33 binding site in CPT1A 3'UTR.** *A.* and *B.* Predicted binding of miR-33a and miR-33b to the (A) unconserved and (B) conserved miR-33 binding site in the CPT1A 3' UTR. *C.* Alignment of the conserved miR-33 binding site in *Drosophila* and *Ciona intestinalis* CPT1 gene. *D.* Predicted seed binding region in the 3'UTR of *Xenopus tropicalis* CPT1A. Shading represents the same as in Figure 5

SUPPLEMENTARY FIGURE S8. **Conservation of miR-33 binding site in CROT 3' UTR** *A.* Evolutionary conservation of the predicted miR-33 binding site in the 3'UTR of CROT. *B.* and *C.* Predicted binding of miR-33b (B) shows two additional Watson-Crick pairs than binding to miR-33a (C). *D.* Evolutionary conservation of second miR-33 binding site in CROT 3' UTR. Shading represents the same as in Figure 5.

SUPPLEMENTARY FIGURE S9. **The splice variant carrying the predicted miR-33 binding site is dominant.** *A.* Schematic representation of the CPT1 alternative transcripts affecting the 3'UTR *B.*

Absolute Ct values of quantitative RT PCR for transcripts with or without the miR-33 binding site in different human organs

**SUPPLEMENTARY FIGURE S10. miR-33 potentially targets additional genes involved in lipid metabolism.** *A. – D.* Evolutionary conservation of predicted binding sites in the 3'UTR of NPC1 (*A* and *B*), ATP8B1 (*C*) and SLC25A25 (*D*). Formatting is identical to Figure 7. *E.* and *F.* Reporter assays to assess influence of premiR-33 on the indicated 3'UTRs cloned downstream of a constitutively active firefly luciferase cassette in the pGL3-control plasmid. Experimental setup and presentation is identical to Figure 2B.

**SUPPLEMENTARY FIGURE S11. TLC analysis of cellular lipids.** Representative Thin layer chromatography scan used to quantify cellular lipids after staining with Primulin and scanning using a fluorescence scanner.

**SUPPLEMENTARY FIGURE S12. Influence of culture conditions and mouse diet on miR-33 levels.** *A.* miR-33 levels are increased upon culture at high cell density and in medium containing lipid free FCS. *B.* Northern Blot analysis of mice fed with high fat diet or control chow for 16 weeks starting at age 4 weeks. As a positive control, HepG2 overexpressing miR-33a were used. Hybridization to miR-33a LNA probe and for U6 RNA are shown. *C.* Northern Blot analysis of mice fed with high fat diet or control chow for 16 weeks starting at age 8 weeks as in (*B*) *D.* Northern Blot analysis of mice on chow diet, after 16h and 39h of starvation or refeeding for 12h.

**SUPPLEMENTARY FIGURE S13. Tissue distribution of miR-33a.** Equal amounts (10µg) of mouse tissue total RNA were analyzed by northern blot for expression of miR-33a and U6. Position of mature miR-33a and premiR-33a are indicated. Ethidium Bromide staining of polyacrylamide gels is shown to demonstrate equal loading. HepG2 cell transduced with a control lentivirus (HepG2 GIPZ) and a lentivirus driving miR-33a (HepG2 miR-33a) were loaded to show the expression level of miR-33a in overexpression experiments. Please note that the HepG2 miR-33a sample on the second gel is from the same gel and exposure as the remainder of this northern blot.

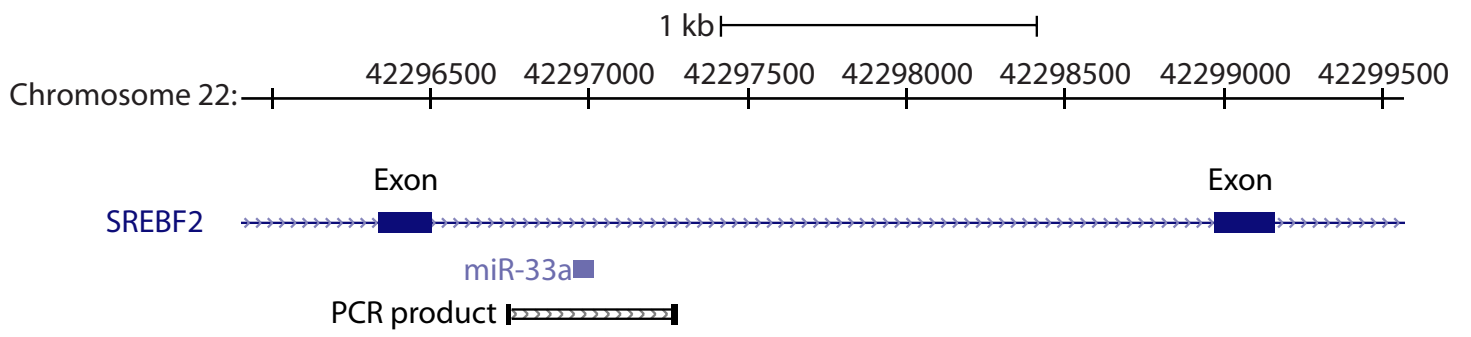

Supplemental Figure S1

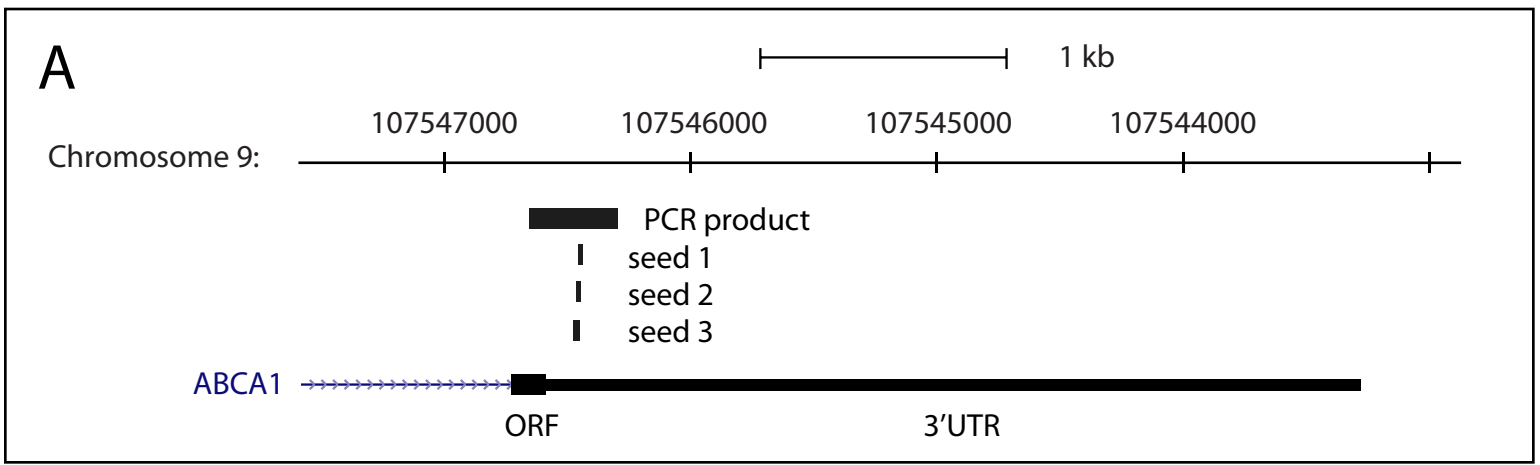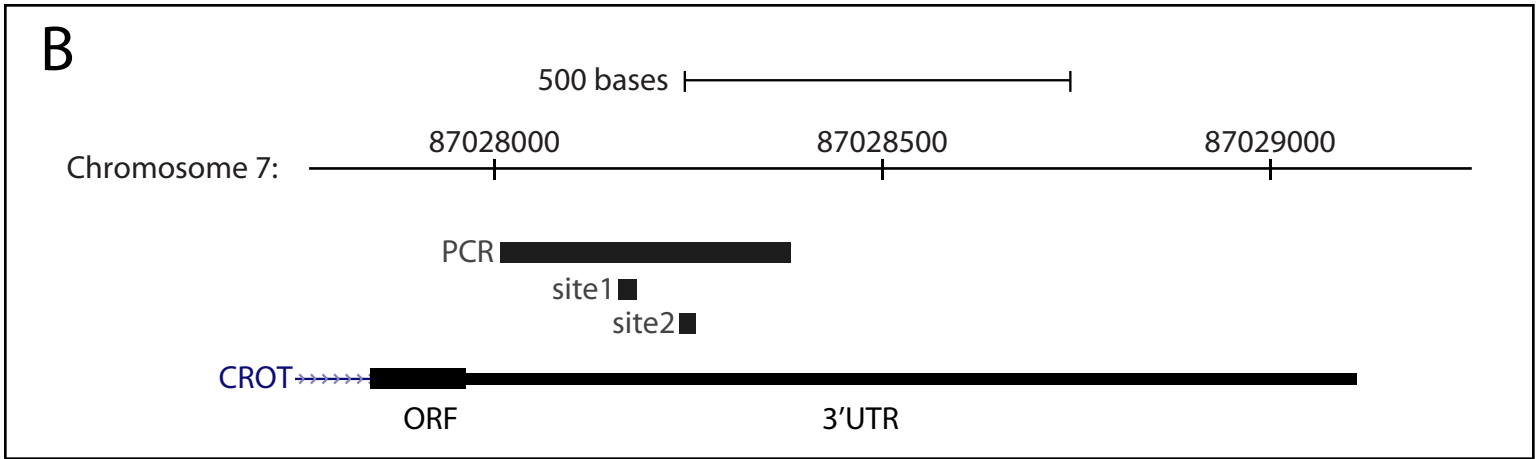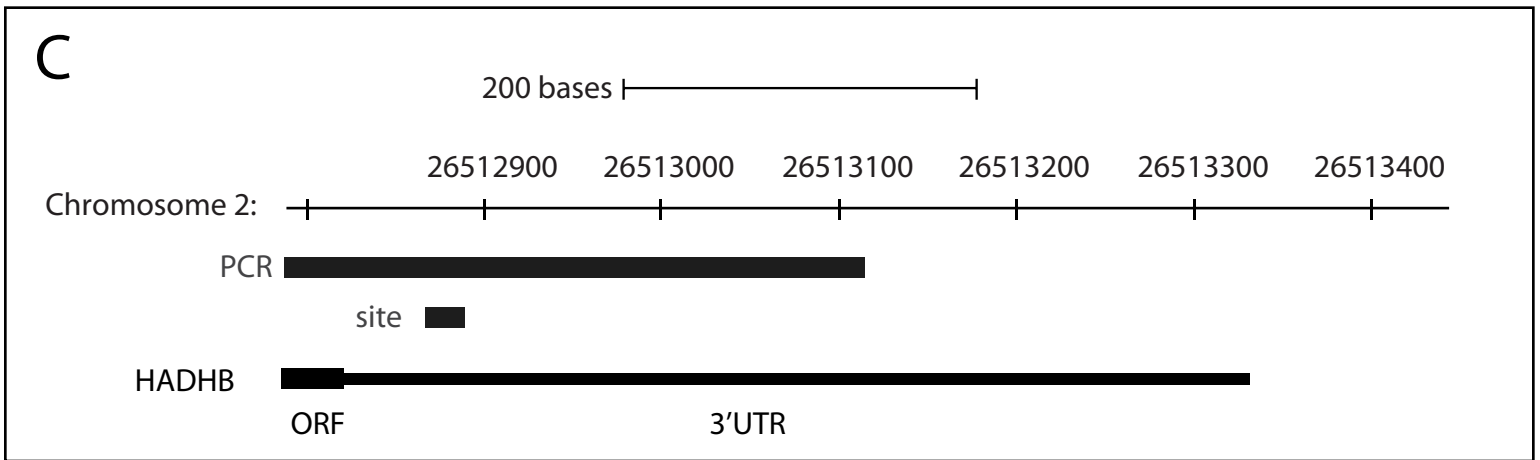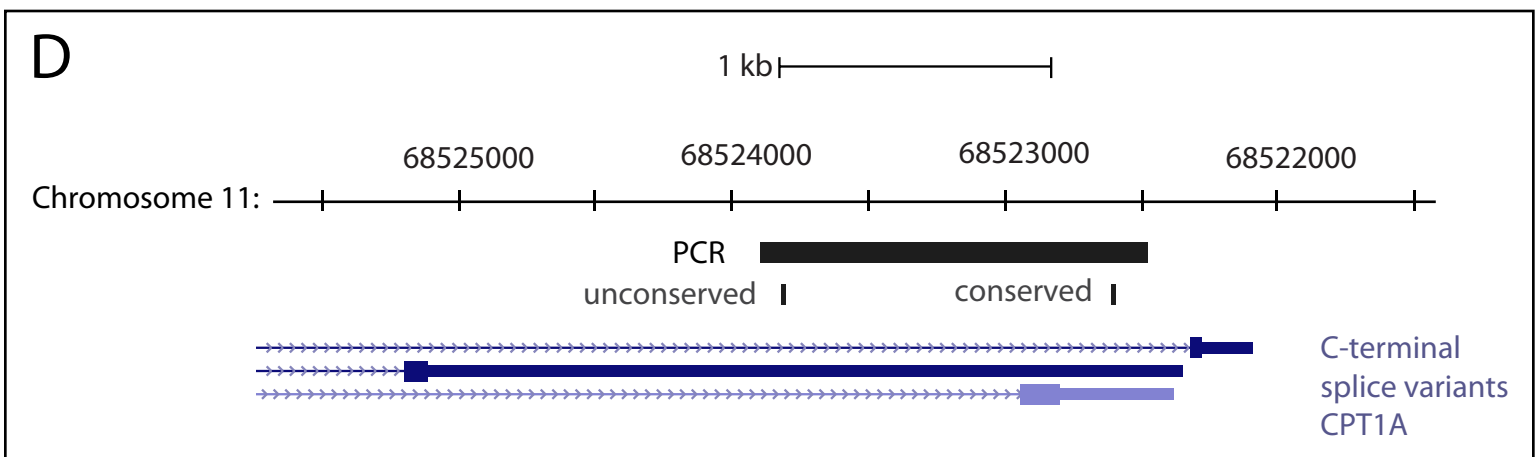

Supplemental Figure S2 A-D



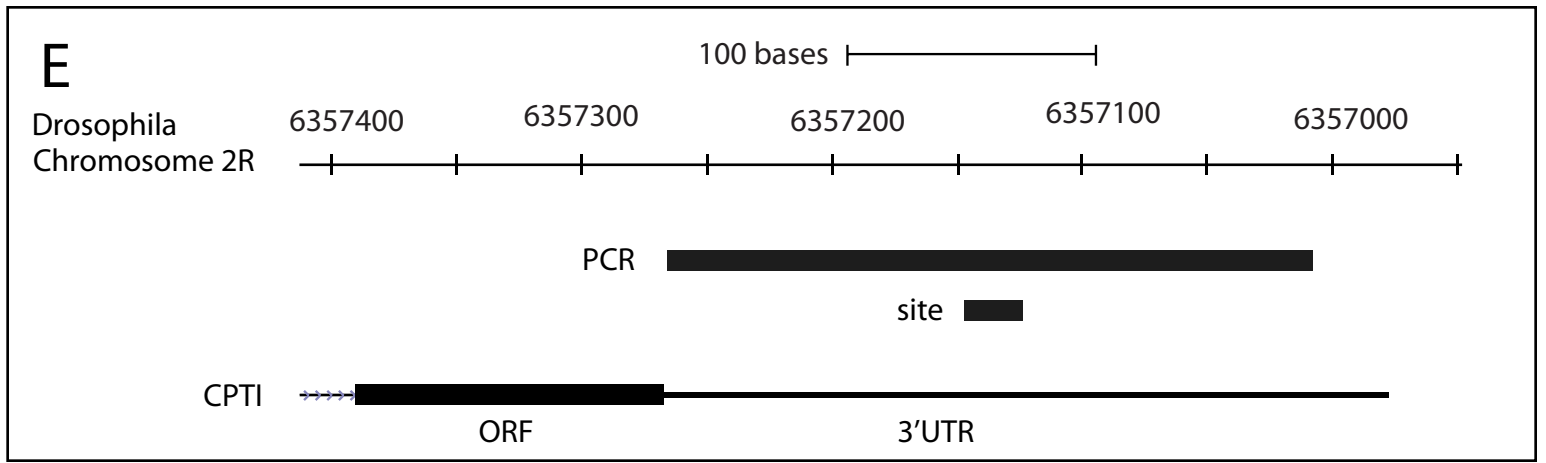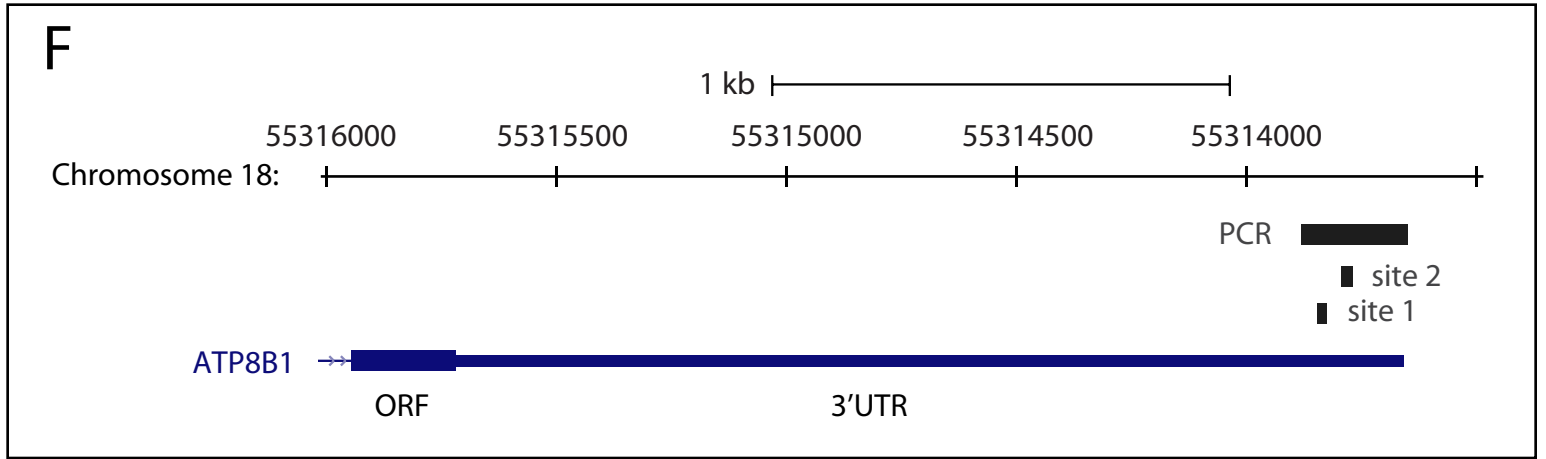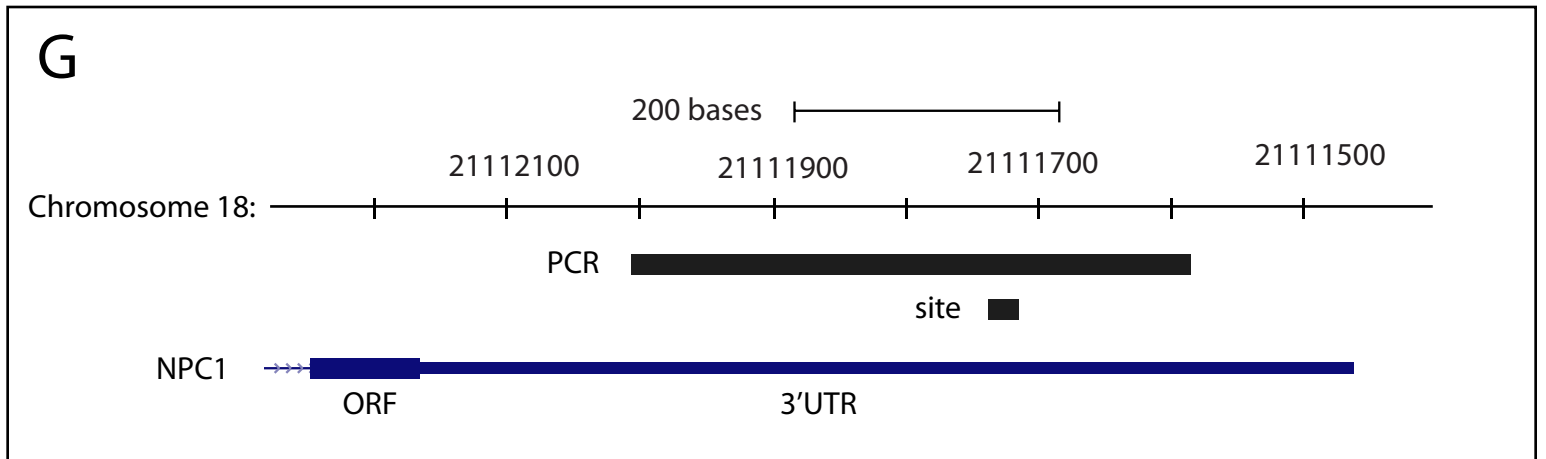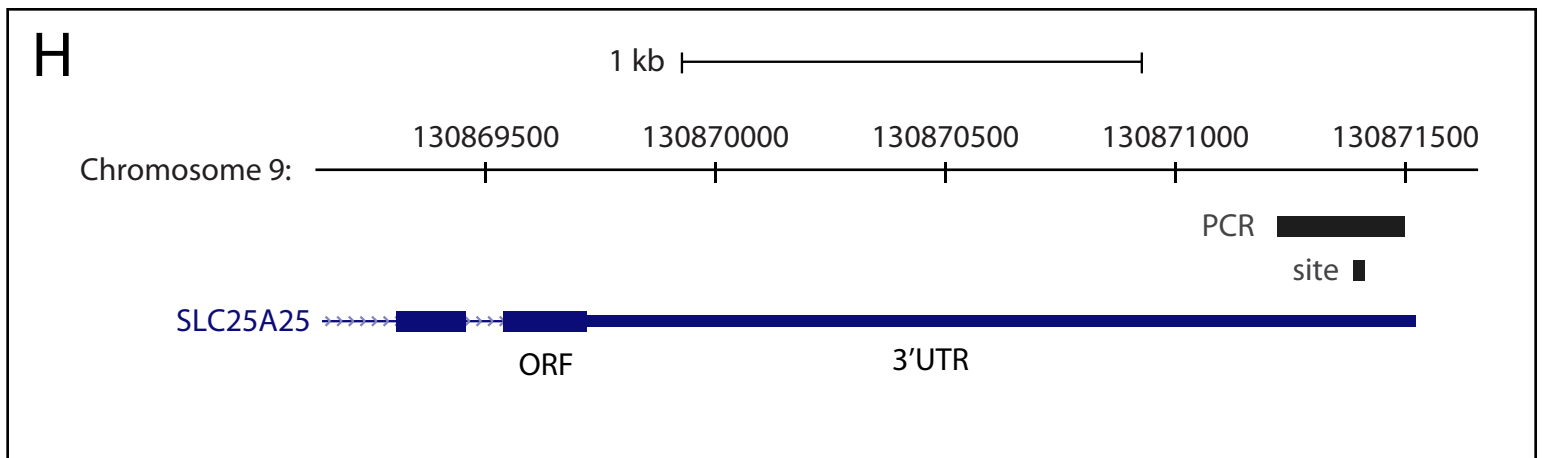

Supplemental Figure S2 E-H

# A

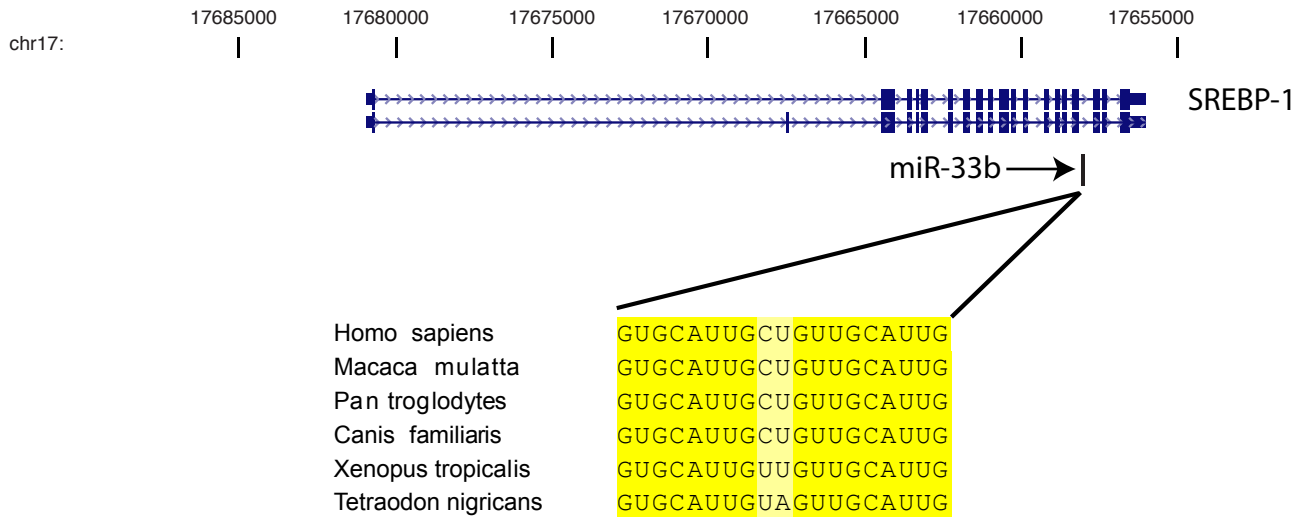

## Supplemental Figure S3

A

|                            |                                      |
|----------------------------|--------------------------------------|
| 3' CGUUACGUUGUCGUUACGUG    | 5' miR-33b                           |
| 3' ACGUUACGUUGAUGUUACGUG   | 5' miR-33a                           |
| :                          |                                      |
| UUCAAUGCAAUGCAAUU-CAAUGCAA | Homo sapiens (ABCA1 3'UTR)           |
| UUCAAUGCAAUGCACUU-CAAUGCAA | Mus musculus (ABCA1 3'UTR)           |
| UUCAAUGCAAUGCACUU-CAAUGCAA | Rattus norvegicus (ABCA1 3'UTR)      |
| UUCAAUGCAAUGCAAUU-CAAUGCAA | Canis familiaris (ABCA1 3'UTR)       |
| CUCAAUGCAAUGCAAAU-CAAUGCAA | Gallus gallus (ABCA1 3'UTR)          |
| AACAAACCAAUGCAAAU-CAAUGCAA | Danio rerio (ABCA1 3'UTR)            |
| GACAAUCAAUGCAGA-GCAAUGCAA  | Tetraodon nigroviridis (ABCA1 3'UTR) |
| CUCAAUGCAAUGCAAAU-CAAUGCAA | Xenopus tropicalis (ABCA1 3'UTR)     |

B

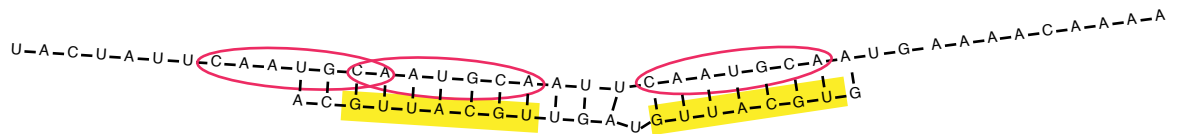

Supplementary Figure S4

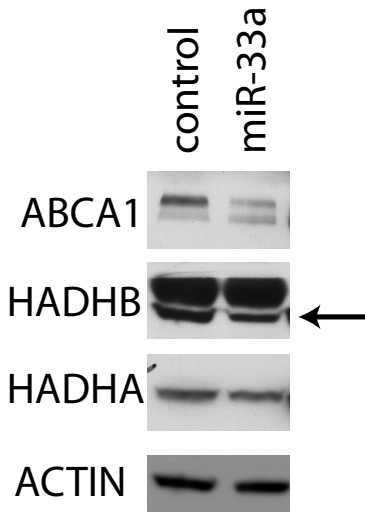

Supplemental Figure S5





A

```
3' CGUUACGUUGUCGUUACGUG 5' miRNA33b
3'ACGUUACGUUGAUGUACGUG 5' miRNA33a
| - : : | | | | | : | - : : | | | | |
UCCUCUGAUGCAGCAGCAAUGCAAA Homo sapiens (CROT)
UCCUGUGUUGCAACCACAAUGCAAA Mus musculus (CROT)
UUCUGUGUUGCAACAGCAAUGCAAA Rattus norvegicus (CROT)
UCCUCUGAUGCAGUAGCAGUGCAGA Canis familiaris (CROT)
UGGCCAUUUGCAACAGCAAUGCAAG Gallus gallus (CROT)
```

conserved site

B

```
3' CGUUACGUUGUCGUUACGUG 5' miRNA33b
: : | | | | | : | | | | |
UCCUCUGAUGCAGCAGCAAUGCAAA Homo sapiens (CROT)
```

C

```
3'ACGUUACGUUGAUGUACGUG 5' miRNA33a
| - : : | | | | | : | : | | | | |
UCCUCUGAUGCAGCAGCAAUGCAAA Homo sapiens (CROT)
```

D

```
3' CGUUACGUUGUCGUUACGUG 5' miRNA33b
3'ACGUUACGUUGAUGUACGUG 5' miRNA33a
| | | | | | | | | | | | | |
AAUCUACAA-ACUUUAACAAUGCAA Homo sapiens (CROT)
AUGUUUUAA-GCCUCAACAAUGCAC Rattus norvegicus (CROT)
AAUCUCUAA-AUUUUAAUAAUGCAA Canis familiaris (CROT)
```

unconserved site

A

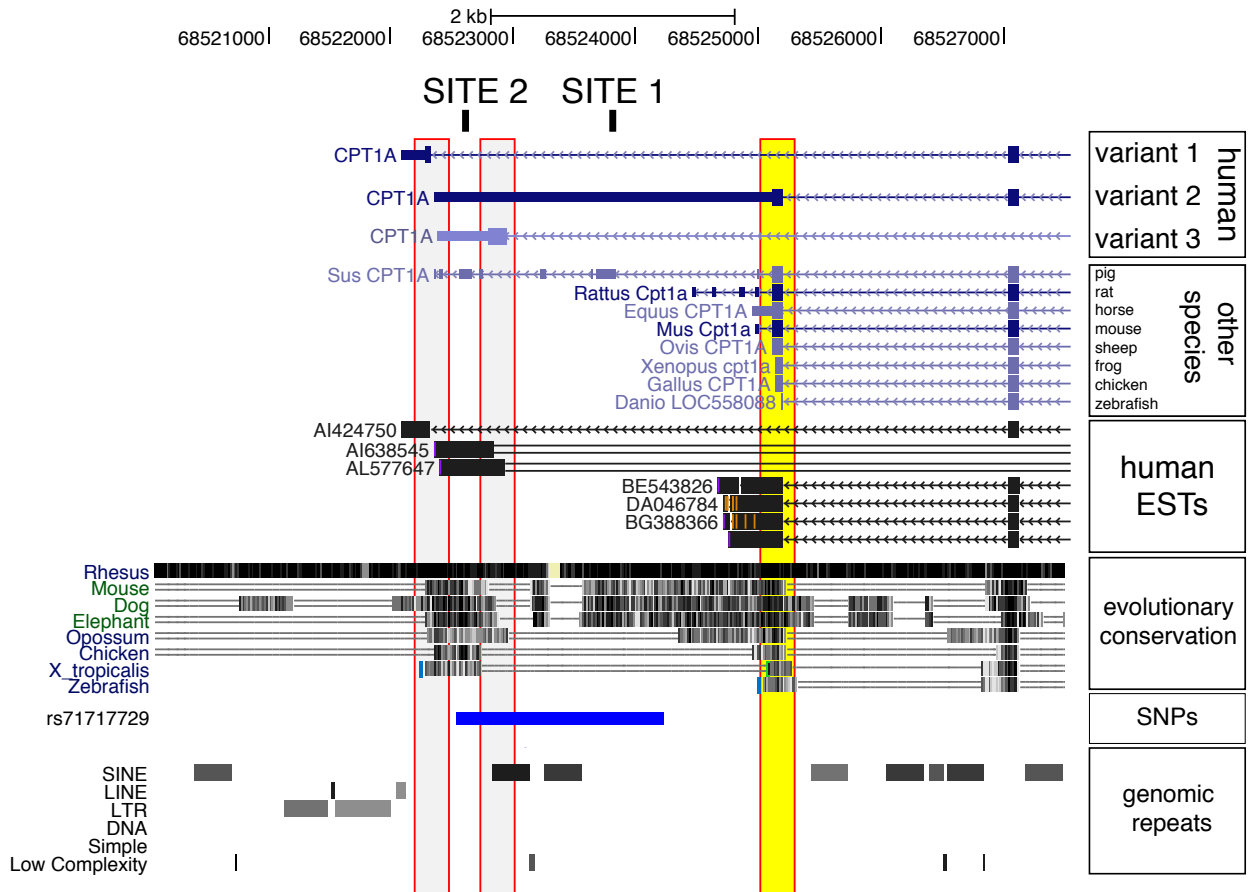

B

|               | variant 2 | variant 1 | difference<br>in Ct |
|---------------|-----------|-----------|---------------------|
| <b>Brain</b>  | 26.56     | 33.12     | 6.57                |
| <b>Colon</b>  | 23.55     | 30.79     | 7.24                |
| <b>Heart</b>  | 22.68     | 31.54     | 8.86                |
| <b>Kidney</b> | 22.57     | 29.92     | 7.36                |
| <b>Liver</b>  | 23.19     | 30.94     | 7.75                |
| <b>Lung</b>   | 25.56     | 34.21     | 8.66                |
| <b>Spleen</b> | 24.15     | 31.66     | 7.51                |
| <b>Testis</b> | 23.55     | 33.04     | 9.49                |
| <b>Thymus</b> | 24.25     | 32.83     | 8.58                |

Supplemental Figure S9



**A**

```

3' CGUUACGUUGUCGUUACGUG 5' miR-33b
3'ACGUUACGUUGAUGUUACGUG 5' miR-33a
      |||:|
ACUCUGUAAAAGGCCAAU--CAAUGCAC Homo sapiens (NPC1-3'UTR)
ACUUUUUAAAAGGCCAAU--CAAUGCAA Canis familiaris (NPC1-3'UTR)
UAAUUUUAAAUGCAGGU--CAAUGCAA Gallus gallus (NPC1-3'UTR)
UUUUGCAA AUGCCAAAU--CAAUGCAC Xenopus tropicalis(NPC1-3'UTR)
      (not conserved in rodents)
  
```

**B**

```

3' CGUUACGUUGUCGUUACGUG 5' miR-33b
3'ACGUUACGUUGAUGUUACGUG 5' miR-33a
      |||:|
UAGUUUAAAAGAGCUUUUAUAAAUGCAA Homo sapiens (NPC1-3'UTR)
UAGUUUAAAAGAGCUUUUAUAAAUGCAA Mus musculus (NPC1-3'UTR)
UAGUUUAAAAGAGCUUUUAUAAAUGCAA Rattus norvegicus (NPC1-3'UTR)
UAGUUUAAAAGAGCUUUUAUAAAUGCAA Canis familiaris (NPC1-3'UTR)
UAGUUCAAAAAUCUACUAAAUGCAA Gallus gallus (NPC1-3'UTR)
  
```

**C**

```

3' CGUUACGUUGUCGUUACGUG 5' miR-33b
3'ACGUUACGUUGAU-GUUACGUG 5' miR-33a
      :|:|:|
UGGAAAAGAUUGACAAUGCAA Homo sapiens (ATP8B1 3'UTR)
UGGGAAGGGUUGGCAAUGCAA Mus musculus (ATP8B1 3'UTR)
CGGGAAGGGUUGACAAUGCAA Rattus norvegicus (ATP8B1 3'UTR)
  
```

**D**

```

3' CGUUACGUUGUC-GUUACGUG 5' miR-33b
3'ACGUUACGUUGAU-GUUACGUG 5' miR-33a
      :|:|:|
CAAUAGGAUGCAAAGAUCAAUGCAA Homo sapiens (SLC25A25 3' UTR)
AAACAGGAUGCAAAGAUCAAUGCAA Mus musculus (SLC25A25 3' UTR)
AAAUAGGAUGCAAAGAUCAAUGCAA Rattus norvegicus (SLC25A25 3' UTR)
AAAUAGGAUGCAAAGAUCAAUGCAA Canis familiaris (SLC25A25 3' UTR)
  
```

**E**

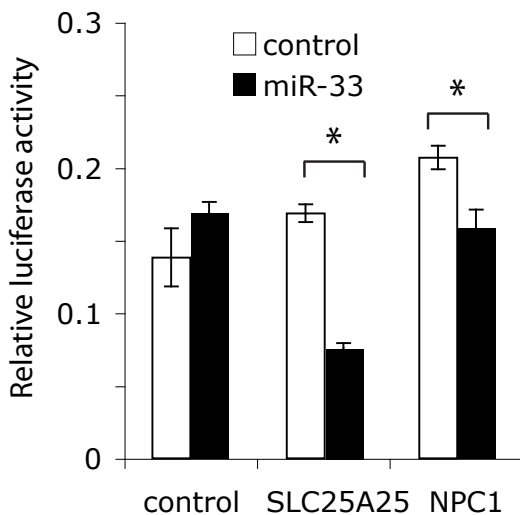

**F**

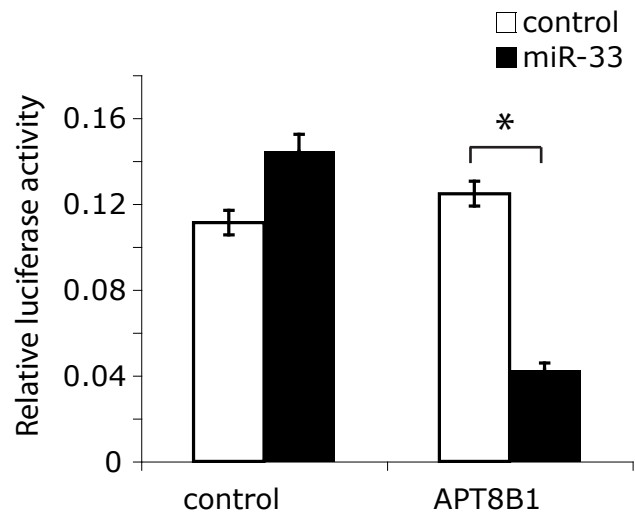

Supplemental Figure S10

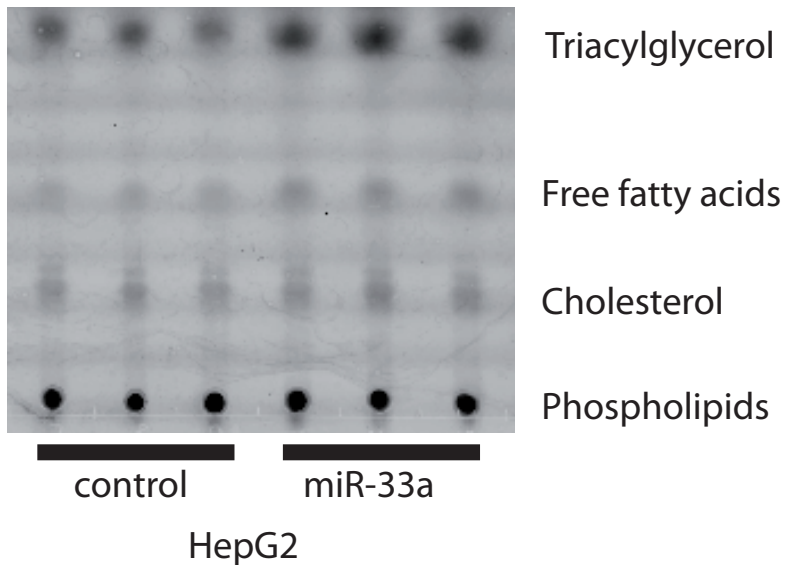

Supplemental Figure S11

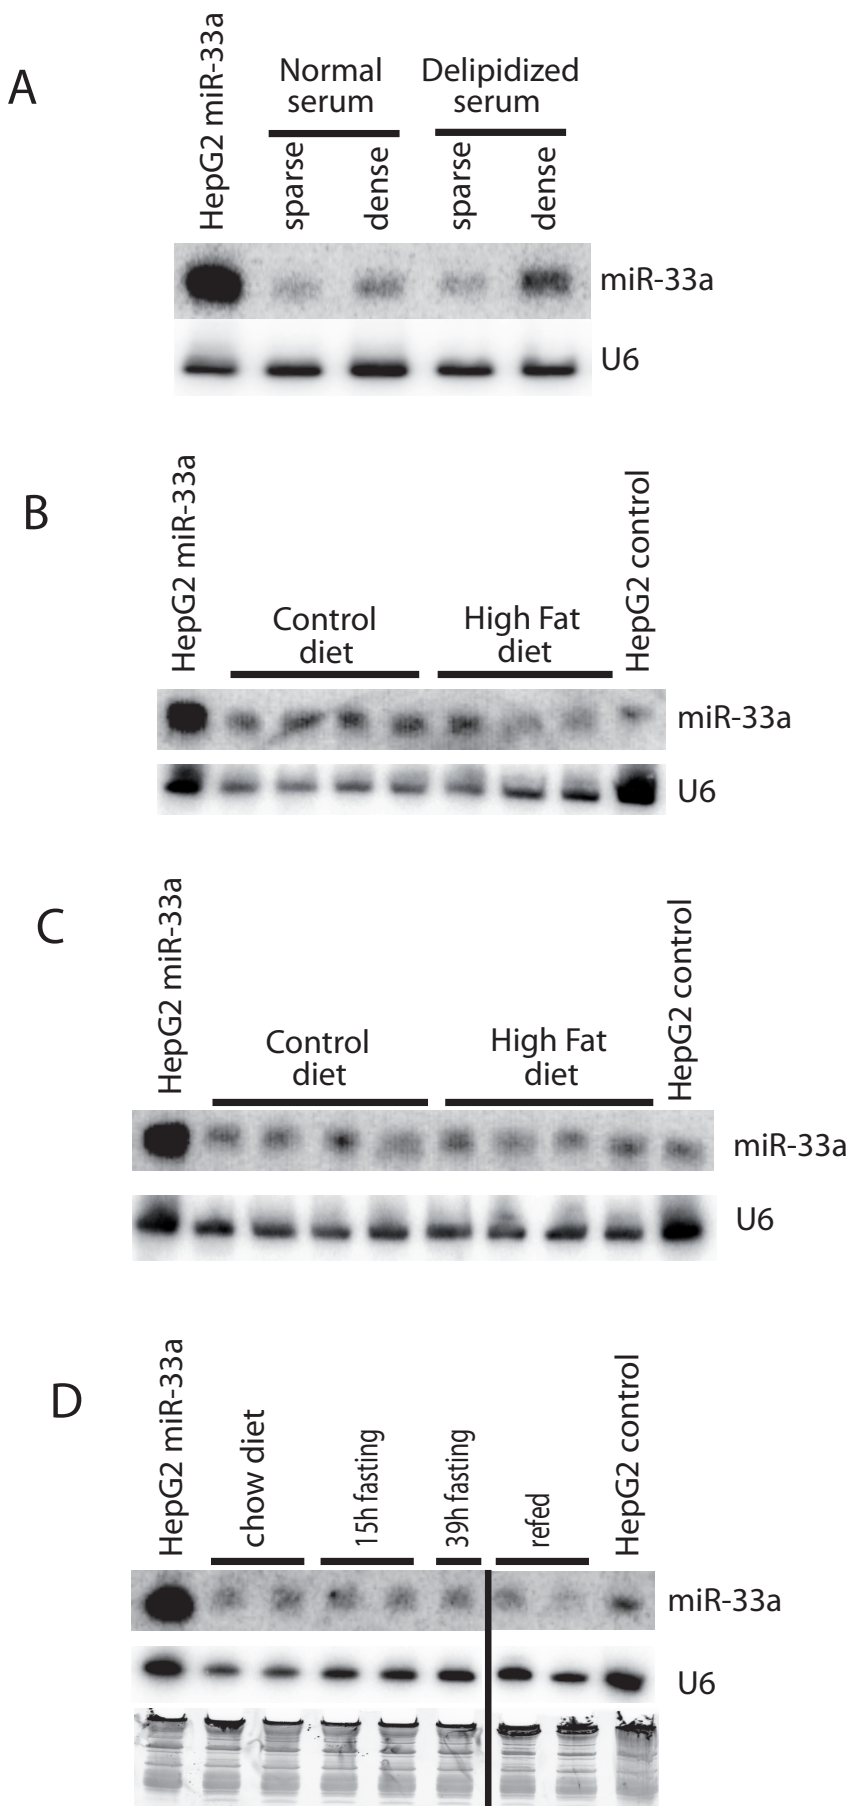

Supplemental figure S12

A

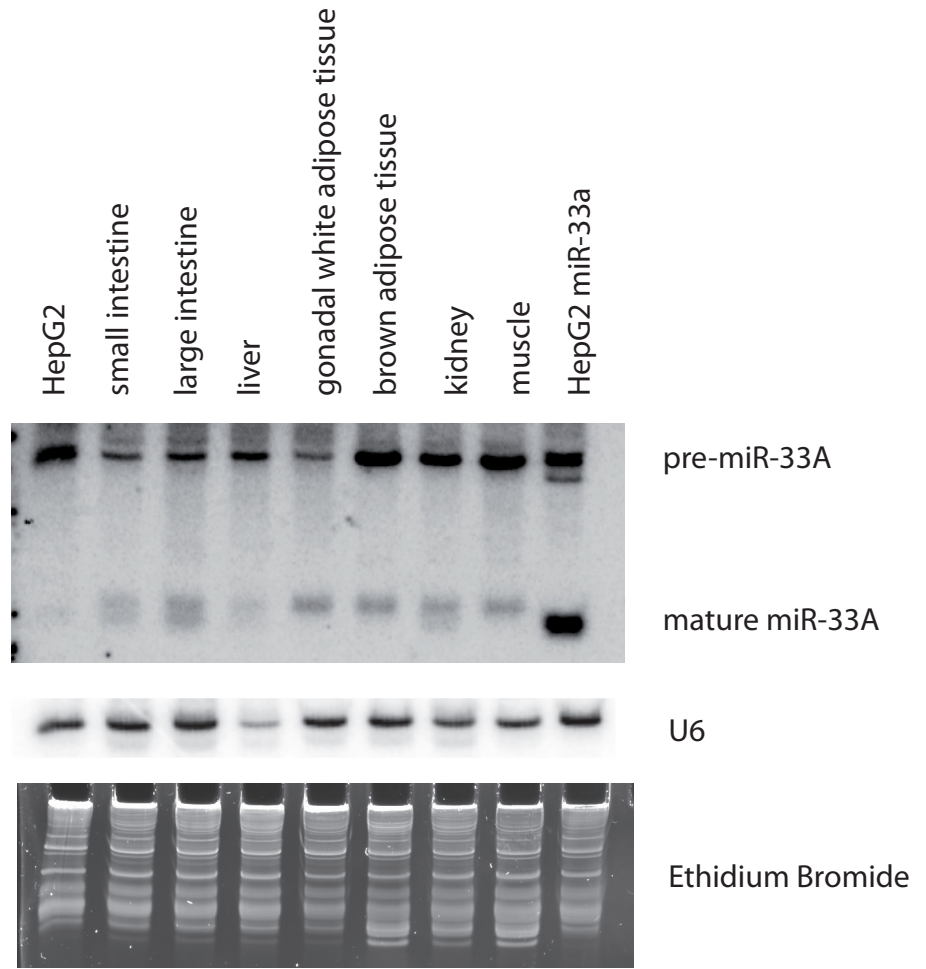

B

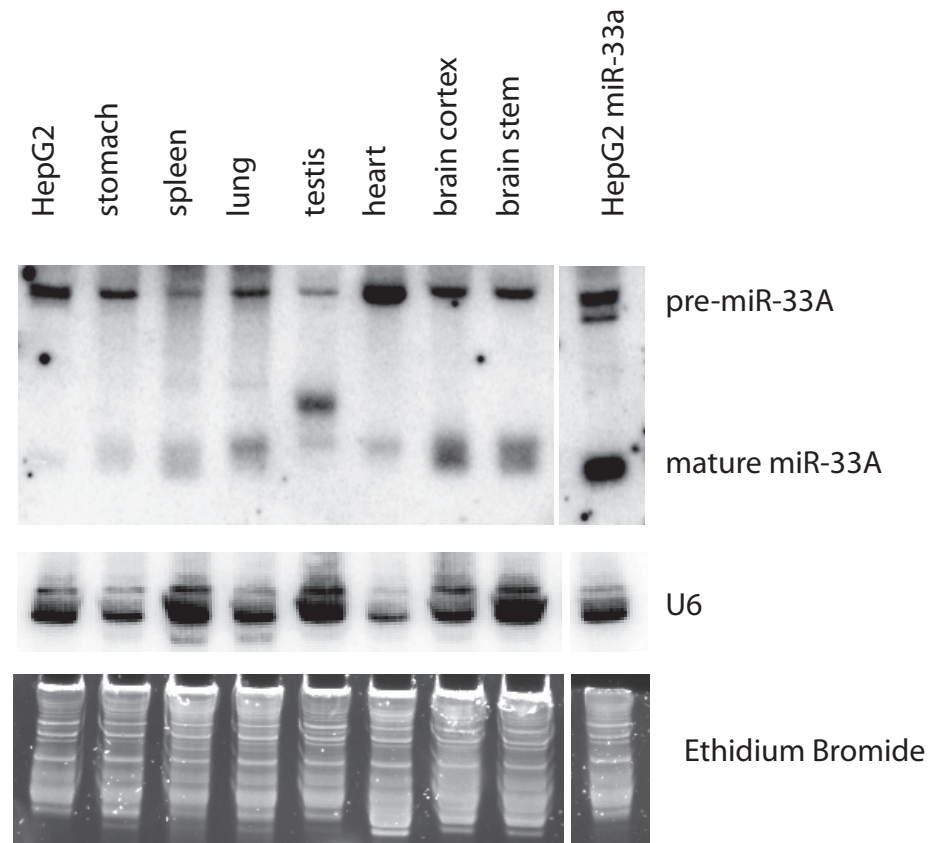

Supplemental Figure S13
